# Supplementary material
Source: publisher figshare collection journal article supplement (https://asha.figshare.com/articles/dataset/_/20539998)
Supplement: Supplementary file 1 [file 1]

### Supplemental Material S3. Additional details of individual differences in consolidation.

To better illustrate the relationship of pitch threshold, training variability and test (i.e., time) in the consolidation of non-native tones, as seen in Figure S2, we plotted the raw accuracy of tone identification at an individual level. The plot highlights individual differences of identification accuracy along with pitch threshold in the posttest 1 (i.e., an immediate test) and in the posttest 2 (i.e., a retest with a 24-hour delay).

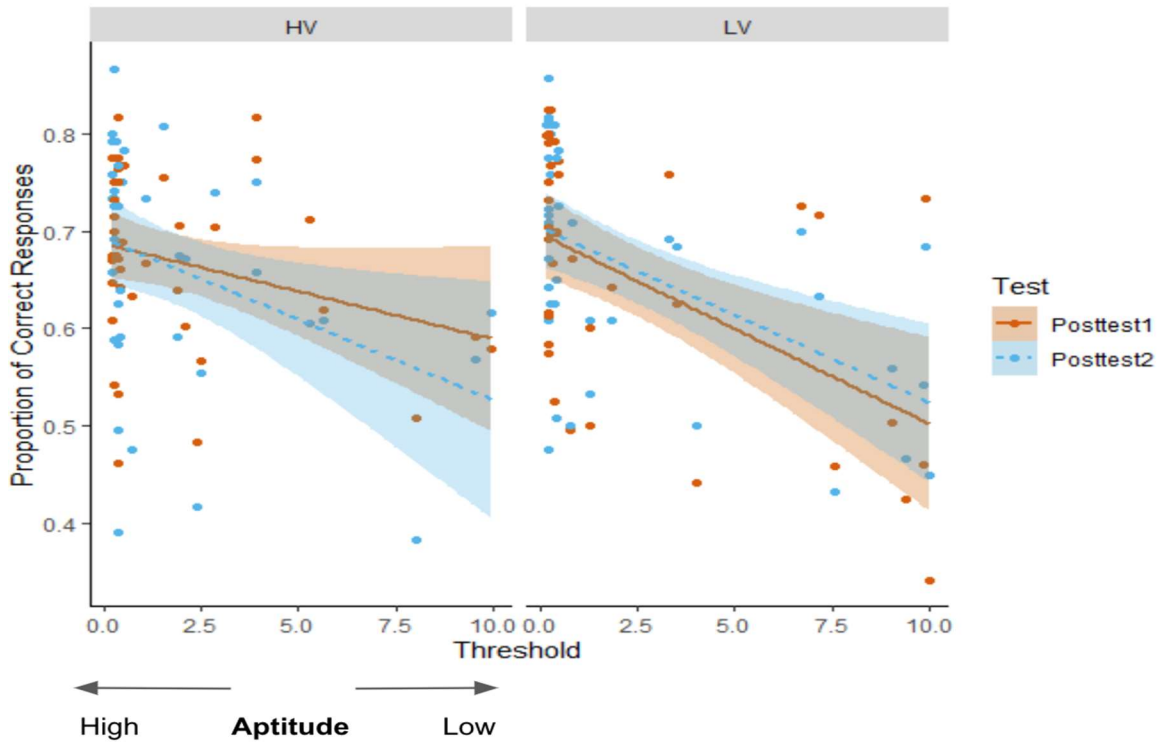

**Figure S2.** Proportion of correct responses in two identification tests (ID Posttest1 and Posttest 2) of two training groups (HV vs. LV) predicted by individual pitch threshold. The shaded area indicates 95% confidence intervals.

Consistent with the results reported in the main text, for HV group, the relationship between pitch threshold and response accuracy became stronger after the 24-hour interval at posttest 2 (blue dashed line) than that of posttest 1 (brown solid line). In HV group, higher aptitude individuals retained their performance after a day whereas lower aptitude individuals did not (i.e., larger individual differences of identification accuracy). However, no such an over-time change was found in the LV group. The relationship between pitch threshold and identification performance was held constant during the 24-hour period.
